# Supplementary material for: Versatile chiral chromatography with mixed stationary phases of water-impregnated silica gel and reversed-phase packing
Source: Royal Society of Chemistry journal article supplement (doi:10.1039/c4an00003j), 2014-01-01
Supplement: c4an00003j.pdf [file c4an00003j.pdf]

## **Electronic Supplementary Information**

# **Versatile Chiral Chromatography with Mixed Stationary Phase of Water-Impregnated Silica Gel and Reversed-Phase Packing**

Satsuki Takahashi and Tetsuo Okada \*

Department of Chemistry, Tokyo Institute of Technology, Meguro-ku, Tokyo 152-8551, Japan.

Email: [tokada@chem.titech.ac.jp](mailto:tokada@chem.titech.ac.jp)

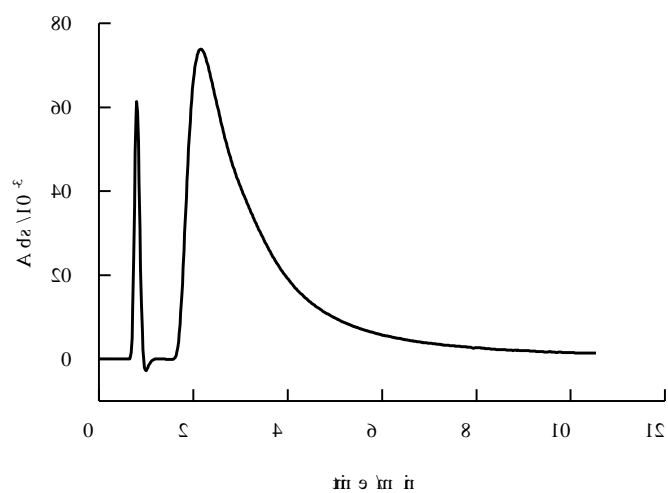

Figure S1 Chromatogram of 1,1'-bis-2-naphthol obtained with silica gel impregnated with an aqueous solution as a stationary phase

Stationary phase, Daisogel SP1000 impregnated with 1 mM  $\beta$ CD + 75 mM KCl. Mobile phase, 1% THF/hexane. Temperature, -9 °C.

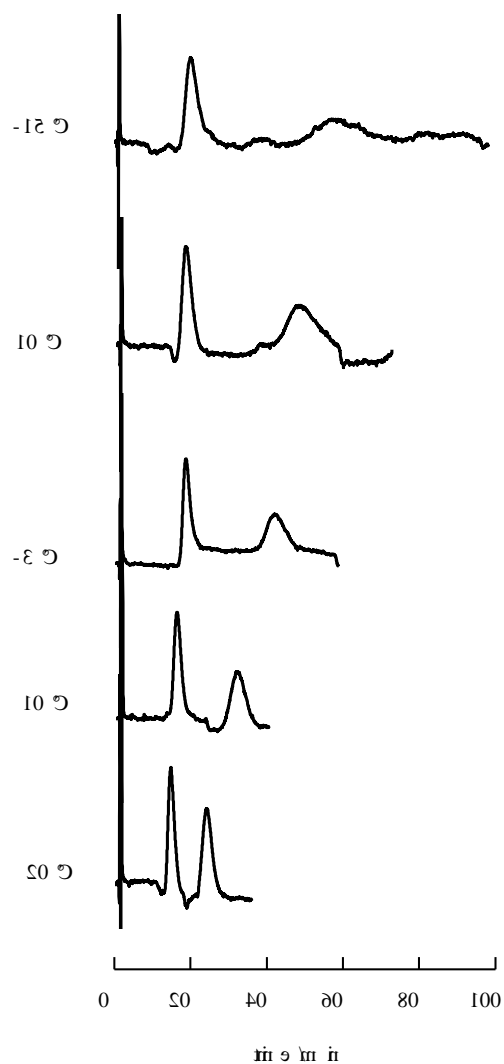

Figure S2 Temperature dependence of chiral separation of hexobarbital. Column, 4.6 mm i.d.  $\times$  75 mm. Stationary phase, 1 mM  $\beta$ CD + 75 mM KCl impregnated 33 % silica gel/ODS. Mobile phase, 3 % THF in hexane.

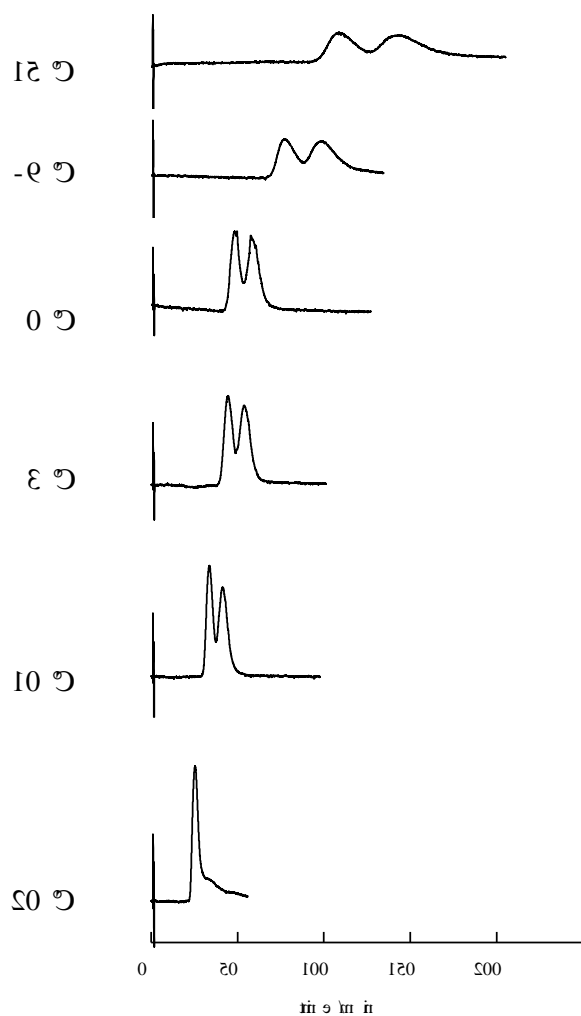

Figure S3 Temperature dependence of chiral separation of bisnaphthol. Column, 4.6 mm i.d. × 75 mm. Stationary phase, 1 mM  $\beta$ CD + 75 mM KCl impregnated 33 % silica gel/ODS. Mobile phase, 1 % THF in hexane.

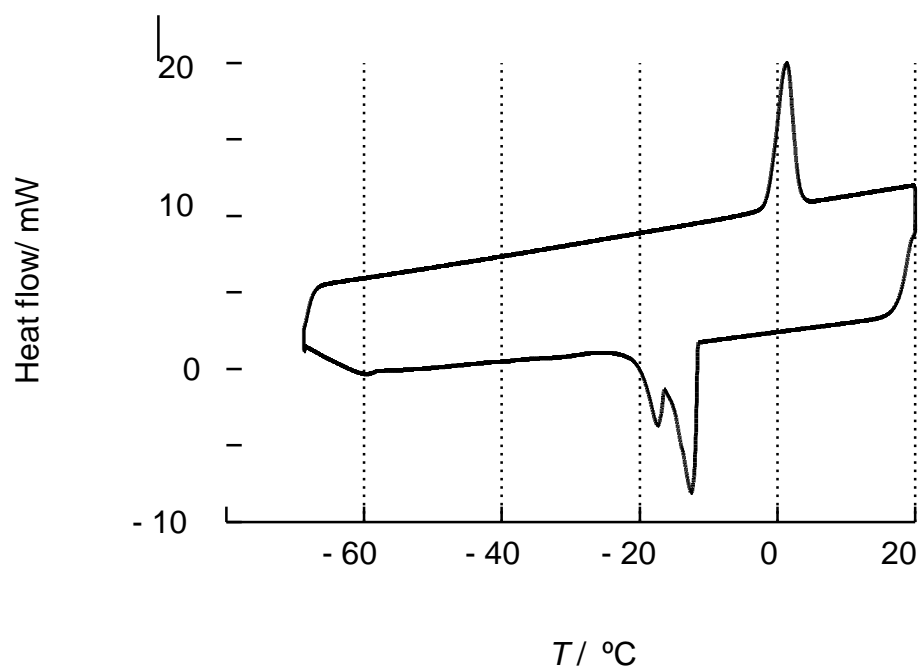

Figure S4 DSC of water in the pores of Daiso SP-1000-100.

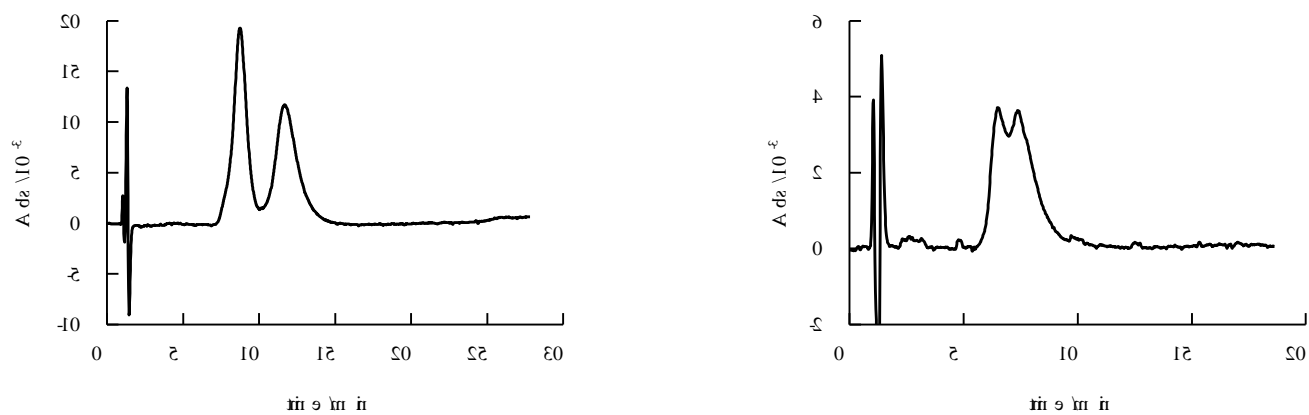

Figure S5 Chiral separation of 2'-hydroxyflavanone (left) and ibuprofen (right)

Column, Wakosil 10SIL / Wakosil 10C18 = 1:2 (w/w). Aqueous 10 mM  $\beta$ CD solution was impregnated in the pores.

Mobile phase, 3% (v/v) THF in hexane. Temperature: 20 °C.

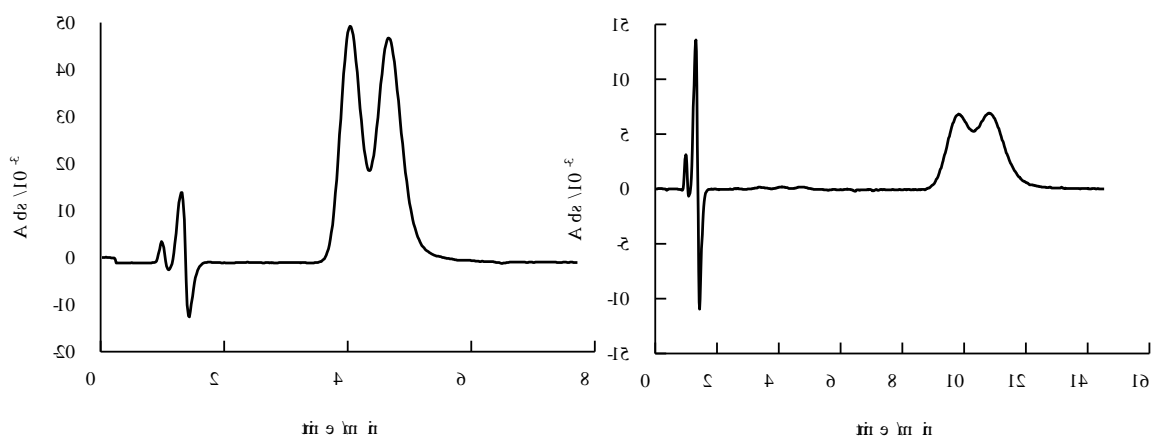

Figure S6 Chiral separation of 2'-hydroxyflavanone (left) and 3'-hydroxyflavanone (right)

Column, Wakosil 10SIL / Wakosil 10C18 = 1:2 (w/w). Aqueous 10 mM 2-hydroxypropyl-β – CD solution was impregnated in the pores.

Mobile phase, 3% (v/v) THF in hexane. Temperature: 20 °C.
